# Supplementary material for: In Vitro Effect of Replicated Porous Polymeric Nano-MicroStructured Biointerfaces Characteristics on Macrophages Behavior
Source: MDPI journal article supplement (doi:10.3390/nano11081913), 2021-07-25
Supplement: s1 [file s1]

# In Vitro Effect of Replicated Porous Polymeric Nano-Micro-Structured Biointerfaces Characteristics on Macrophages Behavior

Luminita Nicoleta Dumitrescu <sup>1</sup>, Madalina Icriverzi <sup>2</sup>, Anca Bonciu <sup>1,3,4</sup>, Anca Roșeanu <sup>2,\*</sup>, Antoniu Moldovan <sup>1</sup> and Valentina Dinca <sup>1,3,\*</sup>

- <sup>1</sup> National Institute for Lasers, Plasma, and Radiation Physics, 409 Atomîștilor Street, 077125 Magurele, Romania; nicoleta.dumitrescu@inflpr.ro (L.N.D.); anca.bonciu@inflpr.ro (A.B.); antoni.moldovan@inflpr.ro (A.M.)
- <sup>2</sup> Institute of Biochemistry of the Romanian Academy of Sciences, 060031 Bucharest, Romania; radu\_mada@yahoo.co.uk
- <sup>3</sup> FOTOPLASMAT Center, 409 Atomîștilor Street, 077125 Magurele, Romania
- <sup>4</sup> Faculty of Physics, University of Bucharest, 405 Atomistilor, 077125 Magurele, Romania
- \* Correspondence: roșeanua@gmail.com (A.R.); valentina.dinca@inflpr.ro (V.D.); Tel.: +402-1457-4414 (V.D.)

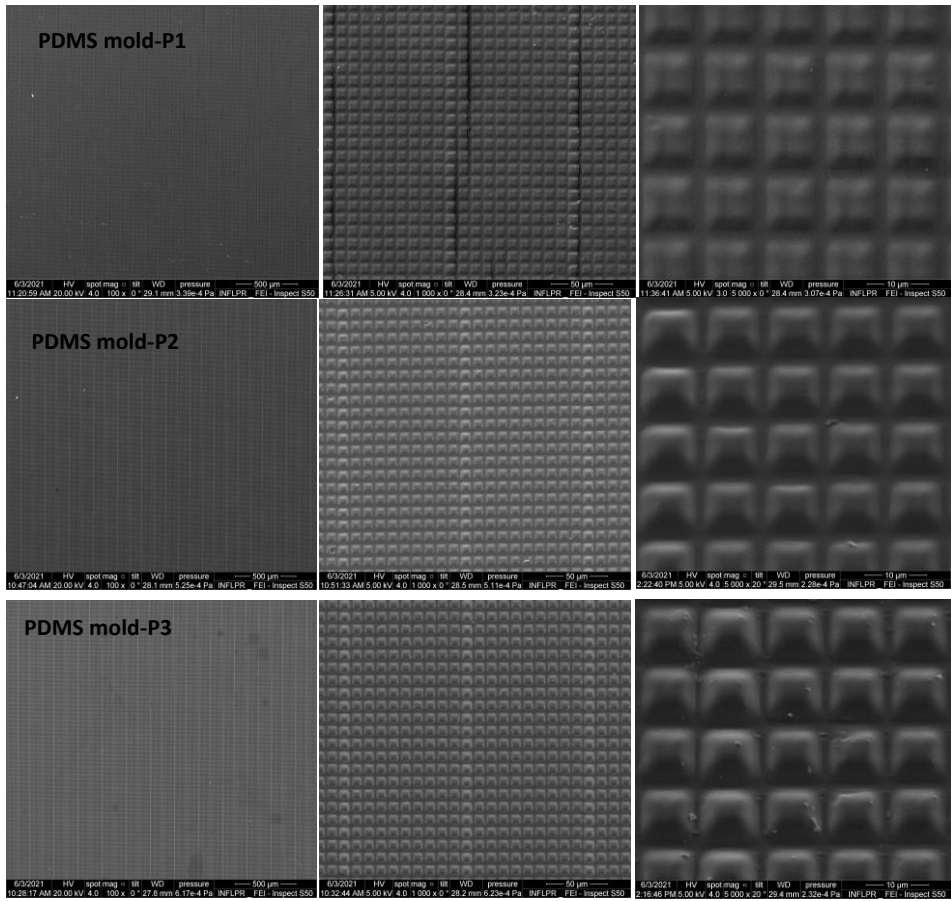

**Figure S1.** SEM micrographs images (right) SYLGARD™ 184 Silicone Elastomer mold shaped as pyramidal microarrays having a lateral size of 8 microns.

**Table S1.** Summary of mean values and standard deviation (SD) values of secreted levels of pro-inflammatory cytokines TNF- $\alpha$  and IL-6 from THP-1 cell cultured on surface materials in lipopolysaccharide treated (w LPS) and non-treated condition (w/o LPS).

| TNF- $\alpha$ pg/ml | Mean values $\pm$ SD (pg/mL) |       |
|---------------------|------------------------------|-------|
|                     | w/o LPS                      | w LPS |

|                   |                                                |                      |
|-------------------|------------------------------------------------|----------------------|
| CTRL              | $-3.68 \pm 0.54$                               | $6659.73 \pm 450.10$ |
| Casted PVDF       | $-2.81 \pm 0.41$                               | $3950.76 \pm 670.67$ |
| P1                | $-2.71 \pm 0.22$                               | $3568.33 \pm 344.91$ |
| P2                | $-3.68 \pm 0.08$                               | $2854.17 \pm 214.46$ |
| P3                | $-3.87 \pm 0.41$                               | $5665.60 \pm 975.99$ |
| <b>IL-6 pg/ml</b> | <b>Mean values <math>\pm</math> SD (pg/mL)</b> |                      |
|                   | <b>w/o LPS</b>                                 | <b>w LPS</b>         |
| CTRL              | $-6.69 \pm 0.20$                               | $5374.33 \pm 130.01$ |
| Casted PVDF       | $-5.65 \pm 0.38$                               | $6881.70 \pm 22.23$  |
| P1                | $-6.09 \pm 0.41$                               | $5188.48 \pm 71.85$  |
| P2                | $-6.05 \pm 0.48$                               | $4845.16 \pm 169.87$ |
| P3                | $-5.53 \pm 0.42$                               | $6190.96 \pm 241.12$ |
